# Supplementary material for: Comorbidities in Obsessive-Compulsive Disorder Across the Lifespan: A Systematic Review and Meta-Analysis
Source: Frontiers journal article supplement (doi:10.3389/fpsyt.2021.703701), 2021-11-11
Supplement: Data_Sheet_5.PDF [file Data_Sheet_5.PDF]

**Table 1: GRADE scoring for each comorbidity in the meta-analysis**

|    | <b>Comorbidity</b>                                        | <b>Risk of bias</b> | <b>Inconsistency</b> | <b>Imprecision</b>   | <b>Indirectness</b> | <b>Publication bias</b> | <b>GRADE score</b>   |
|----|-----------------------------------------------------------|---------------------|----------------------|----------------------|---------------------|-------------------------|----------------------|
| 1  | Any psychiatric comorbidity                               | 1                   | 0                    | 1                    | 1                   | 1                       | 4                    |
| 2  | Any mood disorder                                         | 1                   | 0                    | 1                    | 1                   | 1                       | 4                    |
| 3  | Major Depressive Disorder                                 | 1                   | 0                    | 1 (0 for paediatric) | 1                   | 1                       | 4 (3 for paediatric) |
| 4  | Dysthymia                                                 | 1                   | 0                    | 1                    | 1                   | 0                       | 3                    |
| 5  | Bipolar Disorder                                          | 1                   | 0                    | 1                    | 1                   | 1                       | 4                    |
| 6  | Schizophrenia/Any psychotic disorder                      | 1                   | 0                    | 1                    | 1                   | 0                       | 3                    |
| 7  | Any anxiety disorder                                      | 1                   | 0                    | 1                    | 1                   | 1                       | 4                    |
| 8  | Generalised Anxiety Disorder                              | 1                   | 0                    | 1                    | 1                   | 1                       | 4                    |
| 9  | Social Anxiety Disorder                                   | 1                   | 0                    | 1                    | 1                   | 1                       | 4                    |
| 10 | Panic Disorder                                            | 1                   | 0                    | 1 (0 for paediatric) | 1                   | 1                       | 4 (3 for paediatric) |
| 11 | Agoraphobia                                               | 1                   | 0                    | 1                    | 1                   | 0                       | 3                    |
| 12 | Simple/Specific Phobia                                    | 1                   | 0                    | 1                    | 1                   | 1                       | 4                    |
| 13 | Somatic symptom disorder/Somatoform/Somatization disorder | 1                   | 0                    | 1                    | 1                   | 1                       | 4                    |
| 14 | Hypochondriasis/Illness anxiety disorder                  | 1                   | 0                    | 1                    | 1                   | 1                       | 4                    |
| 15 | Post-traumatic stress disorder (PTSD)                     | 1                   | 0                    | 1                    | 1                   | 0                       | 3                    |
| 16 | Any obsessive compulsive related (spectrum) disorders     | 1                   | 0                    | 0                    | 1                   | 1                       | 3                    |
| 17 | Body dysmorphic disorder                                  | 1                   | 0                    | 0                    | 1                   | 1                       | 3                    |
| 18 | Trichotillomania                                          | 1                   | 0                    | 0                    | 1                   | 1                       | 3                    |
| 19 | Any tic disorder                                          | 1                   | 0                    | 1                    | 1                   | 1                       | 4                    |
| 20 | Any eating disorder                                       | 1                   | 0                    | 1                    | 1                   | 0                       | 3                    |
| 21 | Anorexia nervosa                                          | 1                   | 0                    | 1                    | 1                   | 1                       | 4                    |
| 22 | Bulimia nervosa                                           | 1                   | 1                    | 1                    | 1                   | 1                       | 5                    |
| 23 | Any substance use disorder                                | 1                   | 0                    | 1                    | 1                   | 1                       | 4                    |
| 24 | Autism spectrum disorder                                  | 1                   | 1                    | 1                    | 1                   | 1                       | 5                    |
| 25 | Attention deficit hyperactivity disorder                  | 1                   | 0                    | 1                    | 1                   | 1                       | 4                    |
| 26 | Oppositional defiant disorder                             | 1                   | 0                    | 0                    | 1                   | 1                       | 3                    |
| 27 | Any personality disorder                                  | 1                   | 0                    | 1                    | 1                   | 1                       | 4                    |
| 28 | Obsessive compulsive (Anankastic) personality disorder    | 1                   | 0                    | 1                    | 1                   | 0                       | 3                    |
| 29 | Schizoid personality disorder                             | 1                   | 0                    | 1                    | 1                   | 0                       | 3                    |
| 30 | Schizotypal personality disorder                          | 1                   | 0                    | 1                    | 1                   | 1                       | 4                    |

|    |                                       |   |   |   |   |   |   |
|----|---------------------------------------|---|---|---|---|---|---|
| 31 | Borderline personality disorder       | 1 | 0 | 1 | 1 | 1 | 4 |
| 32 | Histrionic personality disorder       | 1 | 0 | 1 | 1 | 1 | 4 |
| 33 | Antisocial personality disorder       | 1 | 1 | 1 | 1 | 1 | 5 |
| 34 | Narcissistic personality disorder     | 1 | 0 | 1 | 1 | 0 | 3 |
| 35 | Dependent personality disorder        | 1 | 0 | 1 | 1 | 1 | 4 |
| 36 | Anxious-avoidant personality disorder | 1 | 0 | 1 | 1 | 1 | 4 |

**Table 2: Operationalized criteria for GRADE**

| <b>GRADE criteria</b> | <b>Operationalized criteria</b>                                                                                                                                                               | <b>Explanation of GRADE scoring</b>                                                                                                                                                                                                                                                                                                                                                                                                                                                                                                                                                                                                                              | <b>GRADE Score assignment</b>                                                                                                                                             |
|-----------------------|-----------------------------------------------------------------------------------------------------------------------------------------------------------------------------------------------|------------------------------------------------------------------------------------------------------------------------------------------------------------------------------------------------------------------------------------------------------------------------------------------------------------------------------------------------------------------------------------------------------------------------------------------------------------------------------------------------------------------------------------------------------------------------------------------------------------------------------------------------------------------|---------------------------------------------------------------------------------------------------------------------------------------------------------------------------|
| Risk of bias          | <p>1. Study design (cohort)</p> <p>2. Representativeness of sample</p> <p>3. Standardized assessments</p> <p>4. Prevalence estimates considered covariates</p> <p>5. Sensitivity analyses</p> | <p>Covered in selection criteria, most studies were cross-sectional, few were longitudinal in nature for the comorbidity assessed</p> <p>Covered in selection criteria for studies – we only included studies that did not include/ exclude subjects for any comorbidity</p> <p>We only included studies that diagnosed OCD and comorbidities using a standardized tool</p> <p>Moderator (gender, age of onset, age at assessment, illness severity) analyses were performed for all the comorbidities studied</p> <p>Use of leave-one-out analysis, influence and Baujat plots for identification of outliers was done as part of the statistical analysis.</p> | Score of ‘1’ was given to all comorbidities                                                                                                                               |
| Inconsistency         | <p>1. Heterogeneity (<math>I^2</math>)</p> <p>2. Subgroup analysis (by age)</p> <p>3. Sample size variations</p>                                                                              | <p>High heterogeneity (typically &gt;90%) that was statistically significant led to a reduction in the GRADE score</p> <p>This was done for all comorbidities based on adult versus paediatric age group</p> <p>All included studies had a minimum sample size of 100. There was significant variation between studies for most comorbidities. This perhaps contributed to the high heterogeneity.</p>                                                                                                                                                                                                                                                           | All comorbidities with statistically significant heterogeneity were scored ‘0’. Only ASD, Bulimia nervosa and ASPD had non-significant heterogeneity and were scored ‘1’. |
| Imprecision           | 95% confidence intervals                                                                                                                                                                      | 95% confidence intervals that wide enough to impact clinical implications at the upper and lower limit of intervals resulted in a reduction of the GRADE score                                                                                                                                                                                                                                                                                                                                                                                                                                                                                                   | “Any OCRD”, “Trichotillomania”, “BDD” and “ODD” received a score of 0, along with Panic                                                                                   |

|                  |                                                |                                                                                                                                                   |                                                                                                                                                                                                                                                                                                                 |
|------------------|------------------------------------------------|---------------------------------------------------------------------------------------------------------------------------------------------------|-----------------------------------------------------------------------------------------------------------------------------------------------------------------------------------------------------------------------------------------------------------------------------------------------------------------|
|                  |                                                |                                                                                                                                                   | disorder and MDD in paediatric studies. All others were scored '1'.                                                                                                                                                                                                                                             |
| Indirectness     | Generalizability and applicability of findings | All the included studies recruited subjects from clinical populations, hence the findings may be considered generalizable to clinical populations | All received a score of '1'                                                                                                                                                                                                                                                                                     |
| Publication bias | Funnel plots<br>Egger's test<br>Begg's test    | If either of Egger's or Begg's tests were significant, or asymmetry was evident on the Funnel plot, a score of '0' was assigned                   | Schizophrenia/any psychotic disorder, OCPD and narcissistic personality disorder were given a score of "0", based on Egger's/Begg's test; Dysthymia, Agoraphobia, PTSD, Any eating disorder, and Schizoid personality disorder were given a score of '0' based on the Funnel plots. All others were scored '1'. |
